# Supplementary material for: Genome-wide identification of thyroid hormone receptor targets in the remodeling intestine during Xenopus tropicalis metamorphosis
Source: PubMed Central journal article supplement (PMC5527017; doi:10.1038/s41598-017-06679-x), 2017-07-25
Supplement: 41598_2017_6679_MOESM1_ESM.pdf [file 41598_2017_6679_MOESM1_ESM.pdf]

**Genome-wide identification of thyroid hormone receptor targets in the remodeling intestine during *Xenopus tropicalis* metamorphosis**

Liezhen Fu, Biswajit Das, Kazuo Matsuura, Kenta Fujimoto, Rachel A. Heimeier, and Yun-Bo Shi

Section on Molecular Morphogenesis, Eunice Kennedy Shriver National Institute of Child Health and Human Development (NICHD), National Institutes of Health (NIH), Bethesda, Maryland, 20892

\***Corresponding Authors:** Yun-Bo Shi, [Shi@helix.nih.gov](mailto:Shi@helix.nih.gov)

Supplemental Table 1. Genes bound by TR in the intestine and its regulation during development

| ENSEMBLE ID         | Peak signal | Peak position | Gene ID        | Bound by TR in | Regulated during development in* | Gene Description                                                                                                                                      |
|---------------------|-------------|---------------|----------------|----------------|----------------------------------|-------------------------------------------------------------------------------------------------------------------------------------------------------|
| ENXSETG00000000089  | 0.815343925 | 5946          | acy1.1         | T3-treatment   |                                  | aminoacylase 1, gene 1 [Source:Jamboree;Acc:XB-GENE-972681]                                                                                           |
| ENXSETG000000000161 | 0.66053772  | 5946          | sae1           | T3-treatment   |                                  | SUMO1 activating enzyme subunit 1 [Source:Jamboree;Acc:XB-GENE-923356]                                                                                |
| ENXSETG000000000254 | 0.572419037 | 5536          | gtdc1          | Control        |                                  | glycosyltransferase-like domain containing 1 [Source:Jamboree;Acc:XB-GENE-1004420]                                                                    |
| ENXSETG000000000559 | 0.968453088 | 5536          | rcbtb2         | T3-treatment   |                                  | regulator of chromosome condensation (RCC1) and BTB (POZ) domain containing protein 2 [Source:Jamboree;Acc:XB-GENE-952598]                            |
| ENXSETG000000000572 | 1.511153686 | 5126          | acvr1b         | T3-treatment   | Both EP & Non-EP                 | activin A receptor, type IB [Source:Jamboree;Acc:XB-GENE-483904]                                                                                      |
| ENXSETG000000000579 | 0.716015803 | 411           | nr4a1          | T3-treatment   |                                  | nuclear receptor subfamily 4, group A, member 1 [Source:Jamboree;Acc:XB-GENE-483315]                                                                  |
| ENXSETG000000000804 | 0.575752145 | 4511          | nfi3           | Control        | Both EP & Non-EP                 | nuclear factor, interleukin 3 regulated [Source:Jamboree;Acc:XB-GENE-479624]                                                                          |
| ENXSETG000000000835 | 0.589051682 | 821           | nfiB           | T3-treatment   |                                  | nuclear factor I/B [Source:Jamboree;Acc:XB-GENE-486376]                                                                                               |
| ENXSETG000000001582 | 0.679877262 | 2666          | spata5         | Control        |                                  | spermatogenesis associated 5 [Source:Jamboree;Acc:XB-GENE-6054426]                                                                                    |
| ENXSETG000000001921 | 0.728222458 | 2666          | setd1a         | T3-treatment   |                                  | SET domain containing 1A [Source:Jamboree;Acc:XB-GENE-6046043]                                                                                        |
| ENXSETG000000001957 | 0.64693736  | 5671          | cul4a          | T3-treatment   |                                  | cullin 4A [Source:Jamboree;Acc:XB-GENE-1014775]                                                                                                       |
| ENXSETG000000002040 | 0.713648802 | 2461          | myo19          | T3-treatment   |                                  | myosin XIX [Source:Jamboree;Acc:XB-GENE-999897]                                                                                                       |
| ENXSETG000000002271 | 0.576996686 | 5741          | ranbp9         | T3-treatment   |                                  | RAN binding protein 9 [Source:Jamboree;Acc:XB-GENE-494852]                                                                                            |
| ENXSETG000000002589 | 0.727347698 | 6151          | rhou           | T3-treatment   |                                  | ras homolog gene family, member U [Source:Jamboree;Acc:XB-GENE-491190]                                                                                |
| ENXSETG000000002643 | 0.67719223  | 6356          | zmy2           | T3-treatment   |                                  | zinc finger, MYM-type 2 [Source:Jamboree;Acc:XB-GENE-961591]                                                                                          |
| ENXSETG000000002746 | 0.583056381 | 5331          | ppm1b          | Both           |                                  | protein phosphatase, Mg2+/Mn2+ dependent, 1B [Source:Jamboree;Acc:XB-GENE-999170]                                                                     |
| ENXSETG000000002843 | 0.72473583  | 5741          | XB-GENE-992854 | T3-treatment   |                                  | Putative ortholog of galectin-4 (Lactose-binding lectin 4) (L-36 lactose binding protein) (L36LBP), 1 of 1 [Source:Jamboree;Acc:XB-GENE-992854]       |
| ENXSETG000000002899 | 0.633070638 | 1026          | zfp36          | T3-treatment   |                                  | zinc finger protein 36, C3H type, homolog [Source:Jamboree;Acc:XB-GENE-991815]                                                                        |
| ENXSETG000000003127 | 0.642328265 | 616           | ikzf2          | T3-treatment   |                                  | IKAROS family zinc finger 2 (Helios) [Source:Jamboree;Acc:XB-GENE-1013632]                                                                            |
| ENXSETG000000003144 | 0.824862277 | 1846          | gata6          | T3-treatment   |                                  | GATA binding protein 6 [Source:Jamboree;Acc:XB-GENE-485063]                                                                                           |
| ENXSETG000000003160 | 0.751999685 | 411           | dbp            | T3-treatment   |                                  | D site of albumin promoter (albumin D-box) binding protein [Source:Jamboree;Acc:XB-GENE-5995286]                                                      |
| ENXSETG000000003203 | 0.82465633  | 538           | hadhb          | T3-treatment   |                                  | hydroxyacyl-CoA dehydrogenase/3-ketoacyl-CoA thiolase/enoyl-CoA hydratase (trifunctional protein), beta subunit [Source:Jamboree;Acc:XB-GENE-1009673] |
| ENXSETG000000003291 | 0.593119427 | 5331          | polr2e         | T3-treatment   | Non-EP                           | polymyrase (RNA II (DNA directed) polypeptide E, 25kDa) [Source:Jamboree;Acc:XB-GENE-1005304]                                                         |
| ENXSETG000000003440 | 0.600161789 | 1846          | akap9          | T3-treatment   |                                  | A kinase (PRKA) anchor protein (ytotao) 9 [Source:Jamboree;Acc:XB-GENE-5953770]                                                                       |
| ENXSETG000000003506 | 1.152658914 | 5536          | urod           | T3-treatment   | Both EP & Non-EP                 | uroporphyrinogen decarboxylase [Source:Jamboree;Acc:XB-GENE-948493]                                                                                   |
| ENXSETG000000003539 | 0.770937274 | 2461          | dydc1          | T3-treatment   |                                  | DPY3D domain containing 1 [Source:Jamboree;Acc:XB-GENE-6258872]                                                                                       |
| ENXSETG000000003760 | 0.959061959 | 821           | setd1b         | T3-treatment   |                                  | SET domain containing 1B [Source:Jamboree;Acc:XB-GENE-5842344]                                                                                        |
| ENXSETG000000004036 | 0.776047649 | 4013          | ctu1           | T3-treatment   |                                  | cytosolic thiouridylase subunit 1 homolog [Source:Jamboree;Acc:XB-GENE-5872210]                                                                       |
| ENXSETG000000004154 | 0.78070366  | 5741          | cyp20a1        | T3-treatment   |                                  | cytochrome P450, family 20, subfamily A, polypeptide 1 [Source:Jamboree;Acc:XB-GENE-988532]                                                           |
| ENXSETG000000004226 | 0.890489097 | 2666          |                | T3-treatment   |                                  |                                                                                                                                                       |
| ENXSETG000000004328 | 0.927936434 | 5126          | commd5         | Both           |                                  | COMM domain containing 5 [Source:Jamboree;Acc:XB-GENE-952087]                                                                                         |
| ENXSETG000000004334 | 0.63553975  | 3896          | slc25a43       | T3-treatment   |                                  | solute carrier family 25, member 43 [Source:Jamboree;Acc:XB-GENE-6258507]                                                                             |
| ENXSETG000000004766 | 0.669806752 | 1846          | junb           | T3-treatment   |                                  | jun B proto-oncogene [Source:Jamboree;Acc:XB-GENE-945864]                                                                                             |
| ENXSETG000000005251 | 0.727856369 | 5455          | tor2a          | Both           |                                  | torsin family 2, member A [Source:Jamboree;Acc:XB-GENE-5806617]                                                                                       |
| ENXSETG000000005358 | 0.637732736 | 2384          |                | T3-treatment   |                                  | Uncharacterized protein [Source:UniProtKB/TrEMBL;Acc:F6QEX1]                                                                                          |
| ENXSETG000000005387 | 0.812597399 | 5536          | pm20d2         | Both           |                                  | peptidase M20 domain containing 2 [Source:Jamboree;Acc:XB-GENE-969482]                                                                                |
| ENXSETG000000005620 | 1.672538267 | 1231          | LONRF1         | Both           |                                  | LON peptidase N-terminal domain and ring finger 1 [Source:HGNC Symbol;Acc:HGNC:26302]                                                                 |
| ENXSETG000000005659 | 0.703968978 | 5331          | impad1         | T3-treatment   |                                  | inositol monophosphatase domain containing 1 [Source:Jamboree;Acc:XB-GENE-5751033]                                                                    |
| ENXSETG000000005781 | 0.701557582 | 411           | btg3           | T3-treatment   |                                  | BTG family, member 3 [Source:Jamboree;Acc:XB-GENE-995111]                                                                                             |
| ENXSETG000000005902 | 0.797768876 | 2666          | prtfdc1        | Both           | Non-EP                           | phosphoribosyl transferase domain containing 1 [Source:Jamboree;Acc:XB-GENE-942165]                                                                   |
| ENXSETG000000005922 | 0.692352065 | 5946          | hbp1           | T3-treatment   | Both EP & Non-EP                 | HMG-box transcription factor 1 [Source:Jamboree;Acc:XB-GENE-950343]                                                                                   |
| ENXSETG000000006353 | 0.704171704 | 3486          | plap2g         | T3-treatment   |                                  | phospholipase A2, group 6 (cytosolic, calcium-independent) [Source:Jamboree;Acc:XB-GENE-920447]                                                       |
| ENXSETG000000006354 | 0.812978453 | 5536          | kiaa1370       | T3-treatment   |                                  | KIAA1370 [Source:Jamboree;Acc:XB-GENE-5816685]                                                                                                        |
| ENXSETG000000006455 | 0.614311642 | 2051          | camk2g         | T3-treatment   | Non-EP                           | calcium/calmodulin-dependent protein kinase (CaM kinase) II gamma [Source:Jamboree;Acc:XB-GENE-868520]                                                |
| ENXSETG000000006575 | 0.698228027 | 5536          | znf420         | Control        |                                  | zinc finger protein 420 [Source:Jamboree;Acc:XB-GENE-5724906]                                                                                         |
| ENXSETG000000006612 | 0.57694666  | 821           | asah2          | T3-treatment   |                                  | N-acylsphingosine amidohydrolase (non-lysosomal ceramidase) 2 [Source:Jamboree;Acc:XB-GENE-1003068]                                                   |
| ENXSETG000000006614 | 1.508829842 | 1026          | sgms1          | T3-treatment   |                                  | sphingomyelin synthase 1 [Source:Jamboree;Acc:XB-GENE-986773]                                                                                         |
| ENXSETG000000006633 | 0.88852066  | 411           | znf706         | T3-treatment   |                                  | zinc finger protein 706 [Source:Jamboree;Acc:XB-GENE-980122]                                                                                          |
| ENXSETG000000006658 | 0.609945757 | 3281          | dpy19l4        | T3-treatment   |                                  | dpy-19-like 4 [Source:Jamboree;Acc:XB-GENE-6034528]                                                                                                   |
| ENXSETG000000006692 | 0.624332706 | 5946          |                | Both           |                                  |                                                                                                                                                       |
| ENXSETG000000006970 | 0.696381336 | 4716          | jup            | T3-treatment   | Non-EP                           | junction plakoglobin [Source:Jamboree;Acc:XB-GENE-489397]                                                                                             |
| ENXSETG000000006990 | 1.434873376 | 411           |                | Both           |                                  |                                                                                                                                                       |
| ENXSETG000000006993 | 0.760743505 | 7278          |                | Both           |                                  |                                                                                                                                                       |
| ENXSETG000000007013 | 0.867530501 | 5331          | klf11          | T3-treatment   | EP                               | Kruppel-like factor 11 [Source:Jamboree;Acc:XB-GENE-956858]                                                                                           |
| ENXSETG000000007026 | 1.579606243 | 5536          | prkaa1         | T3-treatment   |                                  | protein kinase, AMP-activated, alpha 1 catalytic subunit [Source:Jamboree;Acc:XB-GENE-946195]                                                         |
| ENXSETG000000007200 | 0.664909868 | 1641          | haghl          | T3-treatment   |                                  | hydroxyacylglutathione hydrolase-like [Source:Jamboree;Acc:XB-GENE-987560]                                                                            |
| ENXSETG000000007220 | 0.748116237 | 5126          | rps2           | T3-treatment   |                                  | ribosomal protein S2 [Source:Jamboree;Acc:XB-GENE-1003616]                                                                                            |
| ENXSETG000000007319 | 1.198831016 | 5741          | c20orf3        | T3-treatment   |                                  | chromosome 20 open reading frame 3 [Source:Jamboree;Acc:XB-GENE-5754317]                                                                              |
| ENXSETG000000007320 | 0.750346854 | 6356          | sema3b         | T3-treatment   |                                  | sema domain, immunoglobulin domain (Ig), short basic domain, secreted, (semaphorin) 3B [Source:Jamboree;Acc:XB-GENE-921561]                           |
| ENXSETG000000007329 | 0.733347816 | 4921          | hyal1          | T3-treatment   |                                  | hyaluronoglycosaminidase 1 [Source:Jamboree;Acc:XB-GENE-987118]                                                                                       |
| ENXSETG000000007405 | 0.66533038  | 5741          | dfna5          | T3-treatment   |                                  | deafness, autosomal dominant 5 [Source:Jamboree;Acc:XB-GENE-983245]                                                                                   |
| ENXSETG000000007460 | 0.824158955 | 5331          | xpmp2          | T3-treatment   |                                  | X-prolyl aminopeptidase (aminopeptidase P) 2, membrane-bound [Source:Jamboree;Acc:XB-GENE-969249]                                                     |
| ENXSETG000000007575 | 0.591146631 | 411           | hoxd13         | T3-treatment   |                                  | homeobox D13 [Source:Jamboree;Acc:XB-GENE-482320]                                                                                                     |
| ENXSETG000000007594 | 0.734086198 | 5414          | mrpl46         | Control        | EP                               | mitochondrial ribosomal protein L46 [Source:Jamboree;Acc:XB-GENE-970912]                                                                              |
| ENXSETG000000007619 | 0.758878187 | 3691          | plekhg1        | T3-treatment   |                                  | pleckstrin homology domain containing, family G (with RhoGef domain) member 1 [Source:Jamboree;Acc:XB-GENE-6050489]                                   |
| ENXSETG000000007686 | 0.565087616 | 5536          | fhd1           | T3-treatment   | EP                               | formin homology 2 domain containing 1 [Source:Jamboree;Acc:XB-GENE-948719]                                                                            |
| ENXSETG000000007744 | 0.771914651 | 4809          | tmem185a       | Both           |                                  | transmembrane protein 185A [Source:Jamboree;Acc:XB-GENE-972141]                                                                                       |
| ENXSETG000000007793 | 0.933356484 | 6151          | ahbd11         | T3-treatment   |                                  | ahydrolytic domain containing 11 [Source:Jamboree;Acc:XB-GENE-952690]                                                                                 |
| ENXSETG000000007821 | 0.756808903 | 5741          | anp32a         | T3-treatment   |                                  | acidic (leucine-rich) nuclear phosphoprotein 32 family, member A [Source:Jamboree;Acc:XB-GENE-982550]                                                 |
| ENXSETG000000007900 | 0.703378252 | 4306          | slc25a48       | T3-treatment   |                                  | solute carrier family 25, member 48 [Source:Jamboree;Acc:XB-GENE-5770986]                                                                             |

|                    |             |                      |              |                  |                                                                                                                                                       |
|--------------------|-------------|----------------------|--------------|------------------|-------------------------------------------------------------------------------------------------------------------------------------------------------|
| ENSXETG00000008000 | 0.695937    | 3281 hnf1b           | T3-treatment |                  | HNF1 homeobox B [Source:Jamboree;Acc:XB-GENE-485652]                                                                                                  |
| ENSXETG00000008032 | 0.742327166 | 6971 idh1            | T3-treatment |                  | isocitrate dehydrogenase 1 (NADP+), soluble [Source:Jamboree;Acc:XB-GENE-1004994]                                                                     |
| ENSXETG00000008065 | 0.623786625 | 3896 ehdcd2          | T3-treatment |                  | enoyl CoA hydratase domain containing 2 [Source:Jamboree;Acc:XB-GENE-948250]                                                                          |
| ENSXETG00000008090 | 1.344286445 | 5741 siah1           | T3-treatment |                  | seven in absentia homolog 1 [Source:Jamboree;Acc:XB-GENE-1014415]                                                                                     |
| ENSXETG00000008132 | 0.905530231 | 4921 ankrd17         | T3-treatment |                  | ankyrin repeat domain 17 [Source:Jamboree;Acc:XB-GENE-994421]                                                                                         |
| ENSXETG00000008281 | 0.680314796 | 3691 isoc1           | T3-treatment |                  | isochorismatase domain containing 1 [Source:Jamboree;Acc:XB-GENE-491284]                                                                              |
| ENSXETG00000008472 | 0.58478264  | 5741 cyct            | T3-treatment |                  | cytochrome c, testis [Source:Jamboree;Acc:XB-GENE-5931974]                                                                                            |
| ENSXETG00000008628 | 0.60117618  | 4921 psmc6           | T3-treatment |                  | proteasome (prosome, macropain) 26S subunit, ATPase, 6 [Source:Jamboree;Acc:XB-GENE-978099]                                                           |
| ENSXETG00000008843 | 1.306369732 | 5741 gpatch8         | T3-treatment |                  | G patch domain containing 8 [Source:Jamboree;Acc:XB-GENE-5789711]                                                                                     |
| ENSXETG00000008880 | 1.25908231  | 5331 hook1           | Both         |                  | hook homolog 1 [Source:Jamboree;Acc:XB-GENE-975863]                                                                                                   |
| ENSXETG00000008901 | 0.99212961  | 3486 il4i1           | Both         |                  | interleukin 4 induced 1 [Source:Jamboree;Acc:XB-GENE-6037585]                                                                                         |
| ENSXETG00000008903 | 1.117761716 | 5741 pum2            | T3-treatment |                  | pumilio homolog 2 [Source:Jamboree;Acc:XB-GENE-977105]                                                                                                |
| ENSXETG00000008931 | 0.745656389 | 7381 cers2           | T3-treatment |                  | ceramide synthase 2 [Source:Jamboree;Acc:XB-GENE-852703]                                                                                              |
| ENSXETG00000008966 | 0.691469657 | 5126 syap1           | Control      |                  | synapse associated protein 1 [Source:Jamboree;Acc:XB-GENE-5952691]                                                                                    |
| ENSXETG00000008968 | 0.874312543 | 4829 dtx2            | T3-treatment | Non-EP           | deltex homolog 2 [Source:Jamboree;Acc:XB-GENE-984000]                                                                                                 |
| ENSXETG00000009117 | 1.160053062 | 5946 bend7           | T3-treatment |                  | BEN domain containing 7 [Source:Jamboree;Acc:XB-GENE-6039598]                                                                                         |
| ENSXETG00000009145 | 0.723849614 | 411 slc2a2           | T3-treatment | Both EP & Non-EP | solute carrier family 2 (facilitated glucose transporter), member 2 [Source:Jamboree;Acc:XB-GENE-486462]                                              |
| ENSXETG00000009191 | 0.604202126 | 4921 trim63          | T3-treatment |                  | tripartite motif containing 63 [Source:Jamboree;Acc:XB-GENE-493173]                                                                                   |
| ENSXETG00000009201 | 0.582050358 | 5331 plcx2           | T3-treatment |                  | phosphatidylinositol-specific phospholipase C, X domain containing 2 [Source:Jamboree;Acc:XB-GENE-5832516]                                            |
| ENSXETG00000009486 | 0.665686467 | 6561 smarc2          | T3-treatment |                  | SWI/SNF related, matrix associated, actin dependent regulator of chromatin, subfamily c, member 2 [Source:Jamboree;Acc:XB-GENE-490675]                |
| ENSXETG00000009635 | 1.33168876  | 5737 letmd1          | Both         |                  | LETM1 domain containing 1 [Source:Jamboree;Acc:XB-GENE-962658]                                                                                        |
| ENSXETG00000009655 | 0.939018446 | 5126 mettl1          | T3-treatment |                  | methyltransferase like 1 [Source:Jamboree;Acc:XB-GENE-1000662]                                                                                        |
| ENSXETG00000009865 | 0.625909864 | 5331 vdac2           | T3-treatment |                  | voltage-dependent anion channel 2 [Source:Jamboree;Acc:XB-GENE-954839]                                                                                |
| ENSXETG00000009924 | 0.716819429 | 3760                 | Both         |                  |                                                                                                                                                       |
| ENSXETG00000009990 | 0.619128514 | 411 mospd2           | T3-treatment |                  | motile sperm domain containing 2 [Source:Jamboree;Acc:XB-GENE-957659]                                                                                 |
| ENSXETG00000010012 | 0.530055485 | 5741 sec24d          | Control      |                  | SEC24 family, member D [Source:Jamboree;Acc:XB-GENE-1003364]                                                                                          |
| ENSXETG00000010201 | 1.341229632 | 6089 bre             | T3-treatment |                  | brain and reproductive organ-expressed (TNFRSF1A modulator) [Source:Jamboree;Acc:XB-GENE-1032920]                                                     |
| ENSXETG00000010259 | 0.570132543 | 5946 csnk1g3         | T3-treatment |                  | casein kinase 1, gamma 3 [Source:Jamboree;Acc:XB-GENE-479074]                                                                                         |
| ENSXETG00000010510 | 0.639871586 | 5741 tnfrsf10b       | T3-treatment |                  | tumor necrosis factor receptor superfamily, member 10b [Source:Jamboree;Acc:XB-GENE-941760]                                                           |
| ENSXETG00000010654 | 0.594499198 | 821                  | Control      |                  | Uncharacterized protein [Source:UniProtKB/TrEMBL;Acc:F6Y3B5]                                                                                          |
| ENSXETG00000010848 | 0.731851196 | 4716 fam63b          | T3-treatment |                  | family with sequence similarity 63, member B [Source:Jamboree;Acc:XB-GENE-990463]                                                                     |
| ENSXETG00000011067 | 0.811321601 | 1026 irf2bp1         | T3-treatment |                  | interferon regulatory factor 2 binding protein-like [Source:Jamboree;Acc:XB-GENE-968642]                                                              |
| ENSXETG00000011167 | 0.735032657 | 5536 h2afz           | T3-treatment |                  | H2A histone family, member Z [Source:Jamboree;Acc:XB-GENE-485054]                                                                                     |
| ENSXETG00000011221 | 0.608700504 | 3625 eif2s1          | T3-treatment |                  | eukaryotic translation initiation factor 2, subunit 1 alpha, 35kDa [Source:Jamboree;Acc:XB-GENE-989630]                                               |
| ENSXETG00000011674 | 0.600329882 | 6151 oclad2          | T3-treatment | Non-EP           | OCIA domain containing 2 [Source:Jamboree;Acc:XB-GENE-966006]                                                                                         |
| ENSXETG00000011730 | 0.650060742 | 3691                 | T3-treatment |                  | Uncharacterized protein [Source:UniProtKB/TrEMBL;Acc:F7CRX3]                                                                                          |
| ENSXETG00000012186 | 0.749509734 | 4306 ccnj            | T3-treatment | Both EP & Non-EP | cyclin J [Source:Jamboree;Acc:XB-GENE-485597]                                                                                                         |
| ENSXETG00000012208 | 1.124531048 | 3486 XB-GENE-5804925 | T3-treatment |                  | MGC89226 protein [Source:Jamboree;Acc:XB-GENE-5804925]                                                                                                |
| ENSXETG00000012233 | 0.627756418 | 5946 triap1          | T3-treatment |                  | TP53 regulated inhibitor of apoptosis 1 [Source:Jamboree;Acc:XB-GENE-949263]                                                                          |
| ENSXETG00000012236 | 0.600501662 | 7176 narf            | T3-treatment |                  | nuclear prelamin A recognition factor [Source:Jamboree;Acc:XB-GENE-972855]                                                                            |
| ENSXETG00000012260 | 0.583626499 | 6971 tiparp          | T3-treatment |                  | TCDD-inducible poly(ADP-ribose) polymerase [Source:Jamboree;Acc:XB-GENE-1000138]                                                                      |
| ENSXETG00000012459 | 1.013600299 | 5126 ccnf            | Both         |                  | cyclin F [Source:Jamboree;Acc:XB-GENE-963729]                                                                                                         |
| ENSXETG00000012575 | 0.696018317 | 4306 h3f3b           | T3-treatment | EP               | H3 histone, family 3B (H3.3B) [Source:Jamboree;Acc:XB-GENE-488758]                                                                                    |
| ENSXETG00000012766 | 0.730469393 | 3691 eif5            | Both         |                  | eukaryotic translation initiation factor 5 [Source:Jamboree;Acc:XB-GENE-957969]                                                                       |
| ENSXETG00000012767 | 0.704918463 | 5536 mark3           | T3-treatment |                  | MAP/microtubule affinity-regulating kinase 3 [Source:Jamboree;Acc:XB-GENE-867495]                                                                     |
| ENSXETG00000012944 | 0.637362798 | 7381 foxo6           | T3-treatment |                  | forkhead box O6 [Source:Jamboree;Acc:XB-GENE-482993]                                                                                                  |
| ENSXETG00000013007 | 0.555004017 | 5536 ugp2            | T3-treatment |                  | UDP-glucose pyrophosphorylase 2 [Source:Jamboree;Acc:XB-GENE-974407]                                                                                  |
| ENSXETG00000013175 | 0.564245737 | 1846 gca             | T3-treatment | Non-EP           | grancalcin, EF-hand calcium binding protein [Source:Jamboree;Acc:XB-GENE-983090]                                                                      |
| ENSXETG00000013350 | 0.85759772  | 5832 tfg             | T3-treatment | EP               | trk-fused gene [Source:Jamboree;Acc:XB-GENE-960556]                                                                                                   |
| ENSXETG00000013371 | 0.631310053 | 7381 plcb2           | T3-treatment |                  | phospholipase C, beta 2 [Source:Jamboree;Acc:XB-GENE-6045997]                                                                                         |
| ENSXETG00000013492 | 1.530182345 | 411 insig1           | T3-treatment |                  | insulin induced gene 1 [Source:Jamboree;Acc:XB-GENE-487039]                                                                                           |
| ENSXETG00000013593 | 1.041439305 | 6151 mbd3            | Both         |                  | methyl-CpG binding domain protein 3 [Source:Jamboree;Acc:XB-GENE-491553]                                                                              |
| ENSXETG00000013655 | 0.650751835 | 5331 oas1            | T3-treatment |                  | ornithine decarboxylase antizyme 1 [Source:Jamboree;Acc:XB-GENE-490737]                                                                               |
| ENSXETG00000013658 | 0.920856055 | 4921 dot1l           | Both         | EP               | DOT1-like, histone H3 methyltransferase [Source:Jamboree;Acc:XB-GENE-6033925]                                                                         |
| ENSXETG00000013740 | 0.603216021 | 616 ca2              | T3-treatment | Non-EP           | carbonic anhydrase 2 [Source:Jamboree;Acc:XB-GENE-484348]                                                                                             |
| ENSXETG00000013788 | 0.553746754 | 4411 ciapin1         | Control      | Non-EP           | cytokine induced apoptosis inhibitor 1 [Source:Jamboree;Acc:XB-GENE-998244]                                                                           |
| ENSXETG00000013975 | 0.808084657 | 5126                 | Control      |                  |                                                                                                                                                       |
| ENSXETG00000014257 | 0.60679815  | 7791 XB-GENE-5919586 | T3-treatment |                  | hypothetical protein MGC75872 [Source:Jamboree;Acc:XB-GENE-5919586]                                                                                   |
| ENSXETG00000014408 | 1.811057824 | 2256 sox4            | Both         | Both EP & Non-EP | SRY (sex determining region Y)-box 4 [Source:Jamboree;Acc:XB-GENE-480727]                                                                             |
| ENSXETG00000014423 | 0.64384051  | 6766 stk10           | T3-treatment |                  | serine/threonine kinase 10 [Source:Jamboree;Acc:XB-GENE-494456]                                                                                       |
| ENSXETG00000014519 | 0.611593039 | 5536 brd1            | Control      |                  | bromodomain containing 1 [Source:Jamboree;Acc:XB-GENE-949377]                                                                                         |
| ENSXETG00000014527 | 0.550114424 | 5331 creld2          | Control      |                  | cysteine-rich with EGF-like domains 2 [Source:Jamboree;Acc:XB-GENE-999014]                                                                            |
| ENSXETG00000014529 | 0.972788949 | 4716 pim3            | Both         |                  | pim-3 oncogene [Source:Jamboree;Acc:XB-GENE-922022]                                                                                                   |
| ENSXETG00000014592 | 1.481857819 | 5126 runx11          | T3-treatment |                  | run1-related transcription factor 1; translocated to, 1 (cyclin D-related) [Source:Jamboree;Acc:XB-GENE-481238]                                       |
| ENSXETG00000014609 | 0.678706198 | 5331 decr1           | Both         |                  | 2,4-dienoyl CoA reductase 1, mitochondrial [Source:Jamboree;Acc:XB-GENE-985109]                                                                       |
| ENSXETG00000014629 | 1.3928504   | 5384 pggpp1          | Both         |                  | pyroglutamyl-peptidase I [Source:Jamboree;Acc:XB-GENE-961493]                                                                                         |
| ENSXETG00000014644 | 0.655770768 | 5331 sptlc1          | T3-treatment |                  | serine palmitoyltransferase, long chain base subunit 1 [Source:Jamboree;Acc:XB-GENE-1004880]                                                          |
| ENSXETG00000014689 | 0.7224093   | 6077 tmem67          | Control      |                  | transmembrane protein 67 [Source:Jamboree;Acc:XB-GENE-985149]                                                                                         |
| ENSXETG00000014834 | 0.572675509 | 411 ptch1            | T3-treatment |                  | patched 1 [Source:Jamboree;Acc:XB-GENE-488222]                                                                                                        |
| ENSXETG00000014839 | 0.799269986 | 616 cdc14b           | T3-treatment |                  | CDC14 cell division cycle 14 homolog B [Source:Jamboree;Acc:XB-GENE-977314]                                                                           |
| ENSXETG00000014847 | 0.613115447 | 5331 foxo3           | T3-treatment |                  | forkhead box O3 [Source:Jamboree;Acc:XB-GENE-945072]                                                                                                  |
| ENSXETG00000014909 | 0.749529803 | 1846 arhgap18        | T3-treatment | EP               | Rho GTPase activating protein 18 [Source:Jamboree;Acc:XB-GENE-988160]                                                                                 |
| ENSXETG00000014950 | 1.114596467 | 411 ccdc136          | Both         |                  | coiled-coil domain containing 136 [Source:Jamboree;Acc:XB-GENE-5992991]                                                                               |
| ENSXETG00000015209 | 0.772280825 | 1231 sema4g          | T3-treatment |                  | sema domain, immunoglobulin domain (Ig), transmembrane domain (TM) and short cytoplasmic domain, (semaphorin) 4G [Source:Jamboree;Acc:XB-GENE-856594] |

|                    |             |                |              |                  |                                                                                                                                   |
|--------------------|-------------|----------------|--------------|------------------|-----------------------------------------------------------------------------------------------------------------------------------|
| ENSXETG00000015656 | 0.800730025 | 1231 igfbp1    | T3-treatment | EP               | insulin-like growth factor binding protein 1 [Source:Jamboree;Acc:XB-GENE-485497]                                                 |
| ENSXETG00000015706 | 0.588024608 | 7381 ntm       | T3-treatment |                  | neurotrimin [Source:Jamboree;Acc:XB-GENE-6045425]                                                                                 |
| ENSXETG00000015712 | 0.889180751 | 3175 rabl2b    | Both         | Both EP & Non-EP | RAB, member of RAS oncogene family-like 2B [Source:Jamboree;Acc:XB-GENE-979695]                                                   |
| ENSXETG00000015829 | 1.28411779  | 1641           | T3-treatment |                  | Uncharacterized protein [Source:UniProtKB/TrEMBL;Acc:FUG11]                                                                       |
| ENSXETG00000015930 | 1.271505402 | 1382           | Both         |                  |                                                                                                                                   |
| ENSXETG00000015978 | 0.631119961 | 7381 ski       | T3-treatment | EP               | y-ski sarcoma viral oncogene homolog [Source:Jamboree;Acc:XB-GENE-494028]                                                         |
| ENSXETG00000016078 | 0.653338311 | 4716 lvd       | T3-treatment |                  | isovaleryl-CoA dehydrogenase [Source:Jamboree;Acc:XB-GENE-1008677]                                                                |
| ENSXETG00000016109 | 0.556918001 | 3691 gatm      | Control      |                  | glycine amidinotransferase (L-arginine:glycine amidinotransferase) [Source:Jamboree;Acc:XB-GENE-974514]                           |
| ENSXETG00000016147 | 0.793758254 | 5946 mtfp1     | T3-treatment |                  | mitochondrial fission process 1 [Source:Jamboree;Acc:XB-GENE-1001678]                                                             |
| ENSXETG00000016154 | 0.689053412 | 3691 inpp5j    | T3-treatment |                  | inositol polyphosphate 5-phosphatase J [Source:Jamboree;Acc:XB-GENE-984978]                                                       |
| ENSXETG00000016479 | 1.220125515 | 7421 trpm1     | Both         |                  | transient receptor potential cation channel, subfamily M, member 1 [Source:Jamboree;Acc:XB-GENE-492528]                           |
| ENSXETG00000016685 | 0.962987792 | 821 hps5       | T3-treatment |                  | Hermansky-Pudlak syndrome 5 [Source:Jamboree;Acc:XB-GENE-5931110]                                                                 |
| ENSXETG00000016797 | 0.866475033 | 2461           | Both         |                  |                                                                                                                                   |
| ENSXETG00000016807 | 0.797017854 | 2666 agpat6    | T3-treatment |                  | 1-acylglycerol-3-phosphate O-acyltransferase 6 (lysophosphatidic acid acyltransferase, zeta) [Source:Jamboree;Acc:XB-GENE-999686] |
| ENSXETG00000016952 | 0.644598744 | 5536 ppm1a     | T3-treatment |                  | protein phosphatase, Mg2+/Mn2+ dependent, 1A [Source:Jamboree;Acc:XB-GENE-852654]                                                 |
| ENSXETG00000017065 | 0.667299542 | 5741 mhc1a     | T3-treatment |                  | major histocompatibility complex class I antigen [Source:Jamboree;Acc:XB-GENE-485307]                                             |
| ENSXETG00000017179 | 0.942478568 | 4175 c18orf45  | Both         |                  | chromosome 18 open reading frame 45 [Source:Jamboree;Acc:XB-GENE-971853]                                                          |
| ENSXETG00000017326 | 1.896790901 | 5741 MGC108117 | T3-treatment |                  | MGC108117 protein precursor [Source:RefSeq peptide;Acc:NP_001015694]                                                              |
| ENSXETG00000017395 | 1.480446922 | 5536 spag7     | Both         |                  | sperm associated antigen 7 [Source:Jamboree;Acc:XB-GENE-1010187]                                                                  |
| ENSXETG00000017490 | 0.638835057 | 411 kiaa0196   | T3-treatment | Non-EP           | KIAA0196 [Source:Jamboree;Acc:XB-GENE-5781989]                                                                                    |
| ENSXETG00000017504 | 0.620592715 | 5126 nrg1      | T3-treatment |                  | neuregulin 1 [Source:Jamboree;Acc:XB-GENE-1011451]                                                                                |
| ENSXETG00000017537 | 0.703813304 | 5389 c14orf119 | T3-treatment |                  | chromosome 14 open reading frame 119 [Source:Jamboree;Acc:XB-GENE-996611]                                                         |
| ENSXETG00000017716 | 0.927070124 | 4306 mrps30    | Control      |                  | mitochondrial ribosomal protein S30 [Source:Jamboree;Acc:XB-GENE-964476]                                                          |
| ENSXETG00000017731 | 0.644800655 | 5536 pex11a    | T3-treatment |                  | peroxisomal biogenesis factor 11 alpha [Source:Jamboree;Acc:XB-GENE-970930]                                                       |
| ENSXETG00000017801 | 0.857261504 | 6356 efnb2     | T3-treatment | Both EP & Non-EP | efhrin-B2 [Source:Jamboree;Acc:XB-GENE-488606]                                                                                    |
| ENSXETG00000017860 | 1.114659799 | 5741 mtmr14    | T3-treatment |                  | myotubularin related protein 14 [Source:Jamboree;Acc:XB-GENE-5755863]                                                             |
| ENSXETG00000017991 | 1.893535483 | 3896           | T3-treatment |                  |                                                                                                                                   |
| ENSXETG00000018210 | 1.130281728 | 411 ubxn2a     | T3-treatment |                  | UBX domain protein 2A [Source:Jamboree;Acc:XB-GENE-972873]                                                                        |
| ENSXETG00000018211 | 0.627636343 | 6971 atad2b    | T3-treatment |                  | ATPase family, AAA domain containing 2B [Source:Jamboree;Acc:XB-GENE-5956276]                                                     |
| ENSXETG00000018264 | 0.632917429 | 5741           | Both         |                  |                                                                                                                                   |
| ENSXETG00000018291 | 0.610825523 | 5536 cebpa     | T3-treatment |                  | CCAAT/enhancer binding protein (C/EBP), alpha [Source:Jamboree;Acc:XB-GENE-853397]                                                |
| ENSXETG00000018408 | 0.740624328 | 5946           | T3-treatment |                  |                                                                                                                                   |
| ENSXETG00000018542 | 0.565515144 | 2051           | Control      |                  |                                                                                                                                   |
| ENSXETG00000018642 | 0.694506305 | 4306 pias3     | T3-treatment |                  | protein inhibitor of activated STAT, 3 [Source:Jamboree;Acc:XB-GENE-486632]                                                       |
| ENSXETG00000018646 | 0.576030792 | 2871 SH3RF3    | Control      |                  | SH3 domain containing ring finger 3 [Source:HGNC Symbol;Acc:HGNC:24699]                                                           |
| ENSXETG00000018904 | 0.59082058  | 3691 mtrf1     | T3-treatment |                  | mitochondrial translational release factor 1 [Source:Jamboree;Acc:XB-GENE-991014]                                                 |
| ENSXETG00000019051 | 0.85590678  | 411 kif9       | Both         | Both EP & Non-EP | Kruppel-like factor 9 [Source:Jamboree;Acc:XB-GENE-483889]                                                                        |
| ENSXETG00000019217 | 0.651820172 | 5741 pdlim5    | T3-treatment | Non-EP           | PDZ and LIM domain 5 [Source:Jamboree;Acc:XB-GENE-854114]                                                                         |
| ENSXETG00000019242 | 0.835662324 | 5536 gmppa     | T3-treatment |                  | GDP-mannose pyrophosphorylase A [Source:Jamboree;Acc:XB-GENE-984239]                                                              |
| ENSXETG00000019384 | 0.529587697 | 4921 ncbp2     | Control      |                  | nuclear cap binding protein subunit 2, 20kDa [Source:Jamboree;Acc:XB-GENE-1005786]                                                |
| ENSXETG00000019410 | 0.66718963  | 5946 pafah1b1  | T3-treatment |                  | platelet-activating factor acetylhydrolase 1b, regulatory subunit 1 (45kDa) [Source:Jamboree;Acc:XB-GENE-1002843]                 |
| ENSXETG00000019456 | 0.891376579 | 6151 slc3a2    | T3-treatment | EP               | solute carrier family 3 (activators of dibasic and neutral amino acid transport), member 2 [Source:Jamboree;Acc:XB-GENE-1009245]  |
| ENSXETG00000019718 | 0.715213607 | 6151 cited4    | T3-treatment |                  | Cbp/p300-interacting transactivator, with Glu/Asp-rich carboxy-terminal domain, 4 [Source:Jamboree;Acc:XB-GENE-946639]            |
| ENSXETG00000019748 | 1.086067038 | 2871 vgl1      | T3-treatment |                  | vestigial like 1 [Source:Jamboree;Acc:XB-GENE-982100]                                                                             |
| ENSXETG00000020010 | 0.570222979 | 3281 dhcr24    | T3-treatment |                  | 24-dehydrocholesterol reductase [Source:Jamboree;Acc:XB-GENE-979905]                                                              |
| ENSXETG00000020076 | 0.619781455 | 3486 tmem130   | T3-treatment |                  | transmembrane protein 130 [Source:Jamboree;Acc:XB-GENE-6462848]                                                                   |
| ENSXETG00000020416 | 1.0272873   | 5331 rxrb      | Both         |                  | retinoid X receptor, beta [Source:Jamboree;Acc:XB-GENE-480167]                                                                    |
| ENSXETG00000020432 | 0.613240462 | 2763           | T3-treatment |                  | Uncharacterized protein [Source:UniProtKB/TrEMBL;Acc:F7C1Z2]                                                                      |
| ENSXETG00000020486 | 0.637445582 | 3896 celf4     | T3-treatment |                  | CUGBP, Elav-like family member 4 [Source:Jamboree;Acc:XB-GENE-5873699]                                                            |
| ENSXETG00000020685 | 0.646003054 | 1436 pcca      | T3-treatment | EP               | propionyl CoA carboxylase, alpha polypeptide [Source:Jamboree;Acc:XB-GENE-944987]                                                 |
| ENSXETG00000020739 | 0.609564924 | 1846 MYOSC     | T3-treatment | Non-EP           | myosin VC [Source:HGNC Symbol;Acc:HGNC:7604]                                                                                      |
| ENSXETG00000020930 | 1.00581806  | 5536 aldh2     | T3-treatment | Non-EP           | aldehyde dehydrogenase 2 family (mitochondrial) [Source:Jamboree;Acc:XB-GENE-490836]                                              |
| ENSXETG00000021046 | 0.84551864  | 3281 vmo1      | Both         |                  | vitelline membrane outer layer 1 homolog (chicken) [Source:Jamboree;Acc:XB-GENE-994821]                                           |
| ENSXETG00000021098 | 0.532670829 | 5331 agxt21    | Control      | Non-EP           | alanine-glyoxylate aminotransferase 2-like 1 [Source:Jamboree;Acc:XB-GENE-968831]                                                 |
| ENSXETG00000021543 | 0.560399198 | 3477           | Both         |                  |                                                                                                                                   |
| ENSXETG00000021645 | 0.735016425 | 2461 hal.2     | T3-treatment |                  | histidine ammonia-lyase, gene 2 [Source:Jamboree;Acc:XB-GENE-1009089]                                                             |
| ENSXETG00000021760 | 0.628976111 | 5536 capza2    | T3-treatment |                  | capping protein (actin filament) muscle Z-line, alpha 2 [Source:Jamboree;Acc:XB-GENE-489168]                                      |
| ENSXETG00000021871 | 0.575378286 | 5946 dusp6     | T3-treatment |                  | dual specificity phosphatase 6 [Source:Jamboree;Acc:XB-GENE-978216]                                                               |
| ENSXETG00000022090 | 0.679071809 | 821            | Both         |                  |                                                                                                                                   |
| ENSXETG00000022091 | 1.008327759 | 3795           | Both         |                  |                                                                                                                                   |
| ENSXETG00000022103 | 1.295138632 | 6151           | Both         |                  |                                                                                                                                   |
| ENSXETG00000022107 | 1.137341698 | 4716           | Both         |                  |                                                                                                                                   |
| ENSXETG00000022222 | 0.636533218 | 4921 etfb      | T3-treatment |                  | electron-transfer-flavoprotein, beta polypeptide [Source:Jamboree;Acc:XB-GENE-956098]                                             |
| ENSXETG00000022360 | 1.091474998 | 4101 slc2a11   | Both         |                  | solute carrier family 2 (facilitated glucose transporter), member 11 [Source:Jamboree;Acc:XB-GENE-980809]                         |
| ENSXETG00000022389 | 0.656413192 | 5331 slc25a1   | T3-treatment | EP               | solute carrier family 25 (mitochondrial carrier; citrate transporter), member 1 [Source:Jamboree;Acc:XB-GENE-491686]              |
| ENSXETG00000022397 | 0.782153419 | 4921           | T3-treatment |                  |                                                                                                                                   |
| ENSXETG00000022525 | 0.607636699 | 3076 dll1      | T3-treatment |                  | delta-like 1 [Source:Jamboree;Acc:XB-GENE-479210]                                                                                 |
| ENSXETG00000022643 | 1.328316594 | 4716 c1orf55   | T3-treatment |                  | chromosome 1 open reading frame 55 [Source:Jamboree;Acc:XB-GENE-5807809]                                                          |
| ENSXETG00000022909 | 0.827619088 | 1641 kiaa0232  | T3-treatment |                  | KIAA0232 [Source:Jamboree;Acc:XB-GENE-5888041]                                                                                    |
| ENSXETG00000023023 | 0.793135237 | 616            | Both         |                  |                                                                                                                                   |
| ENSXETG00000023061 | 0.646104839 | 616 xrcc3      | T3-treatment |                  | X-ray repair complementing defective repair in Chinese hamster cells 3 [Source:Jamboree;Acc:XB-GENE-1016741]                      |
| ENSXETG00000023106 | 0.634546958 | 6356 pmpcb     | T3-treatment |                  | peptidase (mitochondrial processing) beta [Source:Jamboree;Acc:XB-GENE-999999]                                                    |
| ENSXETG00000023129 | 0.886038003 | 5126 ier5      | Both         | EP               | immediate early response 5 [Source:Jamboree;Acc:XB-GENE-1004819]                                                                  |
| ENSXETG00000023202 | 0.800996233 | 1641 uba52     | T3-treatment |                  | ubiquitin A-52 residue ribosomal protein fusion product 1 [Source:Jamboree;Acc:XB-GENE-939925]                                    |

|                    |             |                      |              |                                                                                                                                     |
|--------------------|-------------|----------------------|--------------|-------------------------------------------------------------------------------------------------------------------------------------|
| ENSXETG00000023220 | 0.6116615   | 5126                 | T3-treatment | uncharacterized protein LOC100145115 [Source:RefSeq peptide;Acc:NP_001120099]                                                       |
| ENSXETG00000023263 | 1.881293469 | 7791 cops5           | T3-treatment | COP9 constitutive photomorphogenic homolog subunit 5 [Source:Jamboree;Acc:XB-GENE-952827]                                           |
| ENSXETG00000023332 | 0.530257177 | 3076 galnt2          | Control      | UDP-N-acetyl-alpha-D-galactosamine:polypeptide N-acetylgalactosaminyltransferase 2 (GalNAc-T2) [Source:Jamboree;Acc:XB-GENE-980077] |
| ENSXETG00000023408 | 0.573849381 | 5741 sdha            | T3-treatment | succinate dehydrogenase complex, subunit A, flavoprotein (Fp) [Source:Jamboree;Acc:XB-GENE-956942]                                  |
| ENSXETG00000023564 | 0.720251162 | 3896 cndp1           | T3-treatment | carnosine dipeptidase 1 (metallopeptidase M20 family) [Source:Jamboree;Acc:XB-GENE-969925]                                          |
| ENSXETG00000023610 | 0.636469317 | 2256 ghsr            | T3-treatment | growth hormone secretagogue receptor [Source:Jamboree;Acc:XB-GENE-484475]                                                           |
| ENSXETG00000023684 | 0.727461219 | 6766 znf827          | T3-treatment | zinc finger protein 827 [Source:Jamboree;Acc:XB-GENE-1033048]                                                                       |
| ENSXETG00000024399 | 0.900943407 | 7176 THRA            | T3-treatment | thyroid hormone receptor, alpha [Source:RefSeq peptide;Acc:NP_001039261]                                                            |
| ENSXETG00000024449 | 0.921639937 | 4558 ppp1r11         | T3-treatment | protein phosphatase 1, regulatory (inhibitor) subunit 11 [Source:Jamboree;Acc:XB-GENE-999517]                                       |
| ENSXETG00000024480 | 0.760240323 | 5946 ppp1cc          | T3-treatment | protein phosphatase 1, catalytic subunit, gamma isozyme [Source:Jamboree;Acc:XB-GENE-967934]                                        |
| ENSXETG00000024496 | 1.026685959 | 7791 XB-GENE-5810927 | T3-treatment | hypothetical protein LOC100036876 [Source:Jamboree;Acc:XB-GENE-5810927]                                                             |
| ENSXETG00000024509 | 1.437572526 | 1231 slc25a23        | Both         | solute carrier family 25 (mitochondrial carrier, phosphate carrier), member 23 [Source:Jamboree;Acc:XB-GENE-5998763]                |
| ENSXETG00000024677 | 0.590187609 | 5331 ndufa3          | Both         | NADH dehydrogenase (ubiquinone) 1 alpha subcomplex, 3, 9kDa [Source:Jamboree;Acc:XB-GENE-1006323]                                   |
| ENSXETG00000024680 | 0.599198102 | 616                  | T3-treatment |                                                                                                                                     |
| ENSXETG00000024770 | 0.556932815 | 5331                 | Control      | Uncharacterized protein [Source:UniProtKB/TrEMBL;Acc:F7BMN9]                                                                        |
| ENSXETG00000024837 | 0.605949449 | 493                  | T3-treatment |                                                                                                                                     |
| ENSXETG00000024875 | 1.05854878  | 2666 c7orf11         | Both         | chromosome 7 open reading frame 11 [Source:Jamboree;Acc:XB-GENE-942374]                                                             |
| ENSXETG00000024911 | 0.943846094 | 7586 tgfa            | T3-treatment | transforming growth factor, alpha [Source:Jamboree;Acc:XB-GENE-852694]                                                              |
| ENSXETG00000024974 | 0.957426537 | 1210                 | T3-treatment |                                                                                                                                     |
| ENSXETG00000024985 | 0.715945289 | 5741 c19orf63        | T3-treatment | chromosome 19 open reading frame 63 [Source:Jamboree;Acc:XB-GENE-5788294]                                                           |
| ENSXETG00000024993 | 0.678463782 | 4101                 | Both         |                                                                                                                                     |
| ENSXETG00000024995 | 0.741665796 | 7060                 | Both         |                                                                                                                                     |
| ENSXETG00000024996 | 0.945756821 | 1641                 | Both         |                                                                                                                                     |
| ENSXETG00000025000 | 0.636735799 | 654                  | Both         |                                                                                                                                     |
| ENSXETG00000025001 | 0.899952944 | 5856                 | Both         |                                                                                                                                     |
| ENSXETG00000025007 | 0.718542023 | 5331 n4bp1           | T3-treatment | nedd4 binding protein 1 [Source:Jamboree;Acc:XB-GENE-1216138]                                                                       |
| ENSXETG00000025094 | 0.571774656 | 4101                 | T3-treatment |                                                                                                                                     |
| ENSXETG00000025097 | 0.820160785 | 6971 hmgn1           | T3-treatment | high mobility group nucleosome binding domain 1 [Source:Jamboree;Acc:XB-GENE-5782073]                                               |
| ENSXETG00000025179 | 0.630925351 | 821                  | Control      |                                                                                                                                     |
| ENSXETG00000025214 | 0.698840157 | 411 bnip3            | T3-treatment | Both EP & Non-EP<br>BCL2/adenovirus E1B 19kDa interacting protein 3 [Source:Jamboree;Acc:XB-GENE-917115]                            |
| ENSXETG00000025990 | 1.034717537 | 5050 brp44l          | Both         | brain protein 44-like [Source:Jamboree;Acc:XB-GENE-970069]                                                                          |
| ENSXETG00000026175 | 0.59423579  | 5536 timm23          | T3-treatment | translocase of inner mitochondrial membrane 23 homolog [Source:Jamboree;Acc:XB-GENE-994532]                                         |
| ENSXETG00000026398 | 0.675752127 | 2256                 | T3-treatment |                                                                                                                                     |
| ENSXETG00000026537 | 1.028306728 | 3486 gadd45g         | Both         | growth arrest and DNA-damage-inducible, gamma [Source:Jamboree;Acc:XB-GENE-481955]                                                  |
| ENSXETG00000026573 | 0.653136807 | 2461                 | Both         |                                                                                                                                     |
| ENSXETG00000026585 | 0.673202298 | 5331 nudt4           | T3-treatment | nudix (nucleoside diphosphate linked moiety X)-type motif 4 [Source:Jamboree;Acc:XB-GENE-943736]                                    |
| ENSXETG00000026613 | 0.551876403 | 411                  | T3-treatment |                                                                                                                                     |
| ENSXETG00000027016 | 0.591082662 | 4410                 | T3-treatment |                                                                                                                                     |
| ENSXETG00000027093 | 0.920425549 | 6356                 | T3-treatment |                                                                                                                                     |
| ENSXETG00000027097 | 0.684404515 | 4921 arpp19          | T3-treatment | uncharacterized protein LOC100170590 [Source:RefSeq peptide;Acc:NP_001123834]                                                       |
| ENSXETG00000027128 | 0.563404735 | 1231 uqcrcq          | T3-treatment | cAMP-regulated phosphoprotein, 19kDa [Source:Jamboree;Acc:XB-GENE-953906]                                                           |
| ENSXETG00000027133 | 0.667628105 | 616                  | T3-treatment | ubiquinol-cytochrome c reductase, complex III subunit VII, 9.5kDa [Source:Jamboree;Acc:XB-GENE-977452]                              |
| ENSXETG00000027149 | 0.627618807 | 411                  | T3-treatment | Uncharacterized protein [Source:UniProtKB/TrEMBL;Acc:F7E699]                                                                        |
| ENSXETG00000027207 | 0.730305533 | 5126 ufm1            | T3-treatment | ubiquitin-fold modifier 1 [Source:Jamboree;Acc:XB-GENE-973175]                                                                      |
| ENSXETG00000027282 | 0.770056525 | 1436 flvcr2          | T3-treatment | feline leukemia virus subgroup C cellular receptor family, member 2 [Source:Jamboree;Acc:XB-GENE-1016322]                           |
| ENSXETG00000027459 | 0.694000653 | 6151 c7orf23         | Both         | chromosome 7 open reading frame 23 [Source:Jamboree;Acc:XB-GENE-952756]                                                             |
| ENSXETG00000027482 | 0.831291034 | 1026 fbox6           | T3-treatment | F-box protein 6 [Source:Jamboree;Acc:XB-GENE-5797733]                                                                               |
| ENSXETG00000027534 | 0.624596935 | 4101 hoxa4           | T3-treatment | homeobox A4 [Source:Jamboree;Acc:XB-GENE-486676]                                                                                    |
| ENSXETG00000027622 | 0.844216923 | 3896 idh2            | T3-treatment | isocitrate dehydrogenase 2 (NADP+), mitochondrial [Source:Jamboree;Acc:XB-GENE-976315]                                              |
| ENSXETG00000027641 | 0.573501577 | 5331 actg1           | T3-treatment | actin, gamma 1 [Source:Jamboree;Acc:XB-GENE-491618]                                                                                 |
| ENSXETG00000027647 | 1.015082736 | 3076                 | T3-treatment |                                                                                                                                     |
| ENSXETG00000027849 | 0.606264265 | 581 HIST2H2AB        | T3-treatment | histone cluster 1, H2aj [Source:RefSeq peptide;Acc:NP_001004821]                                                                    |
| ENSXETG00000027887 | 1.079704572 | 5741 trib2           | T3-treatment | tribbles homolog 2 [Source:Jamboree;Acc:XB-GENE-489426]                                                                             |
| ENSXETG00000028367 | 0.759261007 | 6633                 | Control      |                                                                                                                                     |
| ENSXETG00000028378 | 0.713175656 | 4170                 | T3-treatment |                                                                                                                                     |
| ENSXETG00000028734 | 0.635904988 | 2382 U2              | Control      | U2 spliceosomal RNA [Source:RFAM;Acc:RF00004]                                                                                       |
| ENSXETG00000028912 | 0.709631379 | 3924                 | Control      |                                                                                                                                     |
| ENSXETG00000028917 | 0.602152831 | 206 xtr-mir-200a     | T3-treatment | xtr-mir-200a [Source:miRBase;Acc:MI0004945]                                                                                         |
| ENSXETG00000029004 | 0.693566044 | 3508 xtr-mir-19b-1   | T3-treatment | xtr-mir-19b-1 [Source:miRBase;Acc:MI0004960]                                                                                        |
| ENSXETG00000029132 | 1.039972972 | 616 xtr-mir-181a-2   | T3-treatment | xtr-mir-181a-2 [Source:miRBase;Acc:MI0004866]                                                                                       |

\*Based the published information by Sun et al. (2013), Expression profiling of intestinal tissues implicates novel genes and pathways essential for adult stem cell development. Endocrinology 154 (11), 4396–4407. Note that the regulation of most of the genes are unknown as they were not found on the microarray used by Sun et al. (2013), likely due to the use of different gene names on the microarray vs. genomic chips. EP: epithelium; non-EP: the rest of the intestine.
